# Supplementary material for: Cell detoxification of secondary metabolites by P4-ATPase-mediated vesicle transport
Source: eLife. 2023 Jul 4;12:e79179. doi: 10.7554/eLife.79179 (PMC10322151; doi:10.7554/eLife.79179)
Supplement: Figure 1—figure supplement 1—source data 1. — The variation in growth rates were shown as [colony diameter CZP supplemented with CsA]/[colony diameter CZP]. All experiments were performed in triplicate. Data are represented as the mean ± SD. ****p<0.0001 from Student′s t-test. File for the primary data corresponding to Figure 1—figure supplement 1D. [file elife-79179-fig1-figsupp1-data1.xlsx]

## Sheet: Sheet1
	Figure 1-figure supplement 1D
	Colony diameter (cm)
					Rep1	Rep2	Rep3
			WT	CZP+CsA	1.9	1.9	1.95
				CZP	3	3.1	3.05
			mu1	CZP+CsA	1.1	1.15	1.1
				CZP	2.8	2.75	2.8
			mu2	CZP+CsA	1.1	1.05	1.1
				CZP	2.75	2.75	2.8
		CZP supplemented with CsA normalized to growth at CZP
					WT	mu1	mu2
				rep1	0.633333	0.392857	0.4
				rep2	0.612903	0.418182	0.381818
				rep3	0.639344	0.392857	0.392857
				Average	0.628527	0.401299	0.391558
				SD	0.0138603	0.0146212	0.00916022
				p-value		4.04877e-05	1.59328e-05
