# Supplementary material for: Cell detoxification of secondary metabolites by P4-ATPase-mediated vesicle transport
Source: eLife. 2023 Jul 4;12:e79179. doi: 10.7554/eLife.79179 (PMC10322151; doi:10.7554/eLife.79179)
Supplement: Figure 1—figure supplement 2—source data 1. — For CsA/FK506 sensitivity analysis, the variation in growth rates were shown as [colony diameter CZP supplemented with CsA]/[colony diameter CZP]. All experiments were performed in triplicate. Data are represented as the mean ± SD. ***p<0.001, ****p<0.0001 from Student′s t-test. File for the primary data corresponding to Figure 1—figure supplement 2C, E and G, I, L, N. [file elife-79179-fig1-figsupp2-data1.xlsx]

## Sheet: Sheet1
	Figure 1-figure supplement 2C							Figure1-figure supplement 2E										Figure1-figure supplement 2G
	BbCRPA expression level																	Colony diameter (cm)
			WT	ΔBbCRPA	ΔBbCRPA::BbCRPA				Colony diameter (cm)				Rep1	Rep2	Rep3					WT	ΔBbCRPA
		Rep1	1.96455	0.0230959	2.64491						WT	CZP+FK506	1.9	1.95	1.9				Rep1	3.35	3.15
		Rep2	2.45687	0.0388383	1.00977							CZP	3.1	3.05	3.05				Rep2	3.4	3.2
		Rep3	1.87461	0.0327734	2.27712														Rep3	3.4	3.15
		Average	2.09868	0.0315692	1.97727						ΔBbCRPA	CZP+FK506	1.45	1.5	1.5				Average	3.38333	3.16667
		SD	0.313447	0.00793999	0.85782							CZP	2.95	2.9	3				SD	0.0288675	0.0288675
																			p-value		0.000777907
											ΔBbCRPA::BbCRPA	CZP+FK506	1.9	1.9	1.85
												CZP	3.1	3.1	3.15
																		Figure1-figure supplement 2I
									CZP supplemented with FK506 normalized to growth at CZP									Conidial yield (× 106 conidial/mm2)
																			WT	ΔBbCRPA
												WT	ΔBbCRPA	ΔBbCRPA::BbCRPA				Rep1	0.304024	0.371864
											Rep1	0.612903	0.491525	0.612903				Rep2	0.360557	0.37312
											Rep2	0.639344	0.517241	0.612903				Rep3	0.281411	0.42086
											Rep3	0.622951	0.5	0.587302				Average	0.315331	0.388615
											Average	0.625066	0.502922	0.604369				SD	0.0407668	0.027932
											SD	0.0133468	0.0131047	0.0147811				p-value		0.0620749
											p-value		0.000348286	0.146236
		Figure1-figure supplement 2L										Figure1-figure supplement 2N
			Colony diameter (cm)				Rep1	Rep2	Rep3				Colony diameter (cm)				Rep1	Rep2	Rep3
					WT	CZP+CsA	2.1	2.15	2						WT	CZP+CsA	2	1.95	1.95
						CZP	3.15	3.2	3.15							CZP	2.8	2.85	2.8
					ΔBbCRPA	CZP+CsA	1	1.05	1						BFL	CZP+CsA	1.95	1.95	1.9
						CZP	2.8	2.75	2.8							CZP	2.8	2.85	2.85
					D614R	CZP+CsA	1.1	1.05	1.1						ΔBbCRPA	CZP+CsA	1.2	1.1	1.1
						CZP	2.8	2.85	2.8							CZP	2.7	2.65	2.65
					I562E	CZP+CsA	1.2	1.2	1.15						DFL	CZP+CsA	1.2	1.2	1.25
						CZP	2.95	2.95	3							CZP	2.65	2.7	2.7
			CZP supplemented with CsA normalized to growth at CZP										CZP supplemented with CsA normalized to growth at CZP
						WT	ΔBbCRPA	D614R	I562E							WT	BFL	ΔBbCRPA	DFL
					Rep1	0.666667	0.357143	0.392857	0.40678						Rep1	0.714286	0.696429	0.444444	0.45283
					Rep2	0.671875	0.381818	0.368421	0.40678						Rep2	0.684211	0.684211	0.415094	0.444444
					Rep3	0.634921	0.357143	0.392857	0.383333						Rep3	0.696429	0.666667	0.415094	0.462963
					Average	0.657821	0.365368	0.384712	0.398964						Average	0.698308	0.682435	0.424878	0.453413
					SD	0.0200023	0.0142463	0.0141082	0.0135367						SD	0.0151254	0.0149602	0.0169453	0.00927298
					p-value		3.26302e-05	4.22572e-05	4.95628e-05						p-value		0.265849	3.1265e-05	1.81516e-05
																ΔBbCRPA	DFL
															Rep1	0.444444	0.45283
															Rep2	0.415094	0.444444
															Rep3	0.415094	0.462963
															Average	0.424878	0.453413
															SD	0.0169453	0.00927298
															p-value		0.06273
