# Supplementary material for: Cell detoxification of secondary metabolites by P4-ATPase-mediated vesicle transport
Source: eLife. 2023 Jul 4;12:e79179. doi: 10.7554/eLife.79179 (PMC10322151; doi:10.7554/eLife.79179)
Supplement: Figure 1—source data 1. — The variation in growth rates was shown as [colony diameter CZP supplemented with CsA]/[colony diameter CZP]. All experiments were performed in triplicate. Data are represented as the mean ± SD. ****p<0.0001 from Student′s t-test. File for the primary data corresponding to Figure 1C. [file elife-79179-fig1-data1.xlsx]

## Sheet: Sheet1
			Figure 1C
				Colony diameter (cm)				Rep1	Rep2	Rep3
						WT	CZP+CsA	2.2	2.15	2.2
							CZP	3.2	3.25	3.25
						mu1	CZP+CsA	1.2	1.25	1.2
							CZP	2.85	2.8	2.9
						ΔBbCRPA	CZP+CsA	1.2	1.15	1.2
							CZP	2.9	2.9	2.85
						ΔBbCRPA::BbCRPA	CZP+CsA	2.15	2.15	2.2
							CZP	3.25	3.25	3.3
				CZP supplemented with CsA normalized to growth at CZP
							WT	mu1	ΔBbCRPA	ΔBbCRPA::BbCRPA
						Rep1	0.6875	0.421053	0.413793	0.661538
						Rep2	0.661538	0.446429	0.396552	0.661538
						Rep3	0.676923	0.413793	0.421053	0.666667
						Average	0.675321	0.427091	0.410466	0.663248
						SD	0.0130548	0.0171353	0.0125848	0.00296077
						p-value		3.71865e-05	1.44957e-05	0.1933
