# Supplementary material for: Cell detoxification of secondary metabolites by P4-ATPase-mediated vesicle transport
Source: eLife. 2023 Jul 4;12:e79179. doi: 10.7554/eLife.79179 (PMC10322151; doi:10.7554/eLife.79179)
Supplement: Figure 2—figure supplement 1—source data 1. — Different fungal strains exhited variation in growth rates which were shown as [colony diameter CZP supplemented with CsA/FK506/5-FAM/CsA-5-FAM/FK506-5-FAM]/[colony diameter CZP]. Data are represented as the mean ± SD. ****p<0.0001 from Student′s t-test. File for the primary data corresponding to Figure 2—figure supplement 1B and D. [file elife-79179-fig2-figsupp1-data1.xlsx]

## Sheet: Sheet1
		Figure 2-figure supplement 1B													Figure 2-figure supplement 1D
		Colony diameter (cm)				Rep1	Rep2	Rep3							Colony diameter (cm)				Rep1	Rep2	Rep3
				WT	CZP	2.9	2.95	2.95									WT	CZP	2.9	2.85	2.85
					5-FAM	2.7	2.7	2.75										5-FAM	2.9	2.95	2.9
					CsA	2.2	2.15	2.2										FK506	2.1	2.05	2.1
					CsA-5-FAM	2.4	2.45	2.45										FK506-5-FAM	2.2	2.15	2.2
				ΔBbCRPA	CZP	2.85	2.85	2.9									ΔBbCRPA	CZP	2.8	2.85	2.8
					5-FAM	2.55	2.55	2.6										5-FAM	2.8	2.75	2.7
					CsA	1.2	1.2	1.15										FK506	1.55	1.5	1.5
					CsA-5-FAM	1.55	1.5	1.5										FK506-5-FAM	1.75	1.7	1.7
		CZP supplemented with 5-FAM/CsA/CsA-5-FAM normalized to growth at CZP													CZP supplemented with 5-FAM/FK506/FK506-5-FAM normalized to growth at CZP
					WT					ΔBbCRPA								WT					ΔBbCRPA
					5-FAM	CsA	CsA-5-FAM			5-FAM	CsA	CsA-5-FAM						5-FAM	FK506	FK506-5-FAM			5-FAM	FK506	FK506-5-FAM
				Rep1	0.931034	0.758621	0.827586			0.894737	0.421053	0.54386					Rep1	1	0.724138	0.758621			1	0.553571	0.625
				Rep2	0.915254	0.728814	0.830508			0.894737	0.421053	0.526316					Rep2	1.03509	0.719298	0.754386			0.964912	0.526316	0.596491
				Rep3	0.932203	0.745763	0.830508			0.896552	0.396552	0.517241					Rep3	1.01754	0.736842	0.77193			0.964286	0.535714	0.607143
				Average	0.926164	0.744399	0.829534			0.895342	0.412886	0.529139					Average	1.01754	0.726759	0.761645			0.976399	0.538534	0.609545
				SD	0.00946622	0.0149503	0.00168717			0.00104782	0.0141456	0.0135318					SD	0.0175439	0.00906096	0.00915472			0.0204412	0.0138448	0.0144054
				p-value		5.86406e-05	6.395e-05				4.97145e-07	1.25406e-06					p-value		1.40303e-05	2.35269e-05				6.69056e-06	1.42468e-05
