# Supplementary material for: Cell detoxification of secondary metabolites by P4-ATPase-mediated vesicle transport
Source: eLife. 2023 Jul 4;12:e79179. doi: 10.7554/eLife.79179 (PMC10322151; doi:10.7554/eLife.79179)
Supplement: Figure 2—source data 1. — The fluorescent intensity was measured by ImageJ. Corrected IntDen (integrated density)=IntDen Area×Mean (background). File for the primary data corresponding to Figure 2G and M. [file elife-79179-fig2-data1.xlsx]

## Sheet: Sheet1
CsA-5-FAM fluorescent intensity within the wild-type and ΔBbCRPA cells Figure 2G											FK506-5-FAM fluorescent intensity within the wild-type and ΔBbCRPA cells Figure 2M
WT	Corrected IntDen = IntDen-Area*Mean (background)										WT	Corrected IntDen = IntDen-Area*Mean (background)
Area	Mean	IntDen	RawIntDen		Corrected IntDen						Area	Mean	IntDen	RawIntDen		Corrected IntDen
0.042	1.319	0.055	4959			background1					0.013	0.883	0.011	1000			background1
0.048	0.92	0.044	3942			background2	0.749666666666667 (background mean)				0.038	0	0	0			background2		0.294618666666667 (background mean)
0.141	0.01	0.001	129			background3					0.039	0.000856	0	3			background3
0.006	18.162	0.107	9662		0.102502	vacuole1					0.005	35.657	0.171	15404		0.169527	vacuole1
0.006	17.942	0.106	9545		0.101502	vacuole2					0.008	27.491	0.23	20673		0.227643	vacuole2
0.009	39.297	0.355	31909		0.348253	vacuole3					0.011	35.183	0.374	33635		0.370759	vacuole3
0.011	28.373	0.322	28940		0.313754	vacuole4					0.02	36.465	0.726	65346		0.720108	vacuole4
0.031	19.397	0.609	54854		0.58576	vacuole5					0.025	18.901	0.481	43321		0.473634	vacuole5
0.029	21.169	0.622	55972		0.60026	vacuole6					0.015	30.686	0.471	42346		0.466581	vacuole6
0.029	20.293	0.596	53654		0.57426	vacuole7					0.013	24.805	0.331	29766		0.32717	vacuole7
0.01	19.377	0.189	17052		0.181503	vacuole8					0.013	12.86	0.171	15432		0.16717	vacuole8
0.021	20.408	0.436	39265		0.420257	vacuole9					0.006	21.822	0.138	12395		0.136232	vacuole9
0.017	19.546	0.332	29866		0.319256	vacuole10					0.011	15.81	0.181	16253		0.177759	vacuole10
0.025	15.415	0.393	35332		0.374258	vacuole11					0.027	15.405	0.411	37034		0.403045	vacuole11
0.029	21.067	0.619	55700		0.59726	vacuole12					0.02	18.198	0.357	32101		0.351108	vacuole12
0.027	26.497	0.708	63698		0.687759	vacuole13					0.015	16.928	0.247	22209		0.242581	vacuole13
0.009	19.548	0.176	15873		0.169253	vacuole14					0.01	12.376	0.124	11138		0.121054	vacuole14
0.011	19.142	0.214	19295		0.205754	vacuole15					0.018	12.907	0.236	21270		0.230697	vacuole15
0.008	49.161	0.387	34806		0.381003	vacuole16					0.026	8.506	0.219	19733		0.21134	vacuole16
0.006	37.968	0.224	20199		0.219502	vacuole17					0.011	14.077	0.158	14190		0.154759	vacuole17
0.015	35.512	0.545	49007		0.533755	vacuole18					0.017	18.111	0.305	27457		0.299991	vacuole18
0.031	23.859	0.745	67092		0.72176	vacuole19					0.031	11.527	0.355	31906		0.345867	vacuole19
0.016	20.204	0.33	29740		0.318005	vacuole20					0.015	14.447	0.218	19648		0.213581	vacuole20
0.015	15.38	0.236	21224		0.224755	vacuole21					0.022	18.314	0.409	36847		0.402518	vacuole21
0.034	17.252	0.584	52585		0.558511	vacuole22					0.026	17.352	0.455	40951		0.44734	vacuole22
0.02	22.863	0.449	40421		0.434007	vacuole23					0.028	15.975	0.442	39745		0.433751	vacuole23
0.021	18.402	0.379	34081		0.363257	vacuole24					0.011	9.982	0.111	10022		0.107759	vacuole24
0.008	22.815	0.179	16153		0.173003	vacuole25					0.011	25.575	0.29	26086		0.286759	vacuole25
0.015	19.881	0.289	26004		0.277755	vacuole26					0.015	15.44	0.226	20381		0.221581	vacuole26
0.012	32.659	0.386	34749		0.377004	vacuole27					0.015	8.714	0.133	11955		0.128581	vacuole27
0.014	34.593	0.486	43726		0.475505	vacuole28									Average	0.290329
0.012	24.102	0.297	26705		0.288004	vacuole29									SD	0.143303
0.022	26.632	0.582	52411		0.565507	vacuole30
0.004	39.084	0.165	14852		0.162001	vacuole31
0.004	32.942	0.139	12518		0.136001	vacuole32					ΔBbCRPA
0.004	26.721	0.113	10154		0.110001	vacuole33					Area	Mean	IntDen	RawIntDen
0.016	33.961	0.555	49991		0.543005	vacuole34					0.027	0.574	0.027	2389			background1
0.029	18.33	0.524	47145		0.50226	vacuole35					0.021	0.035	0.000756	68			background2		0.203 (background mean)
0.022	28.496	0.614	55282		0.597507	vacuole36					0.006	0	0	0			background3
0.014	22.938	0.319	28719		0.308505	vacuole37					0.001	4.893	0.006	548		0.00575	vacuole1
0.027	18.146	0.485	43623		0.464759	vacuole38					0.001	6.616	0.008	741		0.00775	vacuole2
0.024	10.823	0.257	23162		0.239008	vacuole39					0.001	5.99	0.006	575		0.00575	vacuole3
0.02	17.509	0.344	30956		0.329007	vacuole40					0.002	6.244	0.011	974		0.0105	vacuole4
0.02	27.467	0.548	49330		0.533007	vacuole41					0.002	12.912	0.021	1911		0.0205	vacuole5
0.048	21.973	1.051	94571		1.01502	vacuole42					0.002	8.11	0.012	1103		0.0115	vacuole6
				Average	0.391262						0.002	0.79	0.002	158		0.0015	vacuole7
				SD	0.198125						0.007	0.383	0.003	245		0.00125	vacuole8
ΔBbCRPA											0.004	0.72	0.003	262		0.002	vacuole9
Area	Mean	IntDen	RawIntDen		Corrected IntDen						0.007	4.855	0.036	3243		0.03425	vacuole10
0.077	0.3	0.023	2084			background1					0.008	8.979	0.075	6752		0.073	vacuole11
0.09	0.029	0.003	236			background2	0.125 (background mean)				0.007	0.982	0.007	593		0.00525	vacuole12
0.073	0.046	0.003	305			background3					0.011	1.507	0.016	1465		0.01325	vacuole13
0.006	7.902	0.047	4204		0.04625	vacuole1					0.009	7.57	0.071	6359		0.06875	vacuole14
0.009	6.165	0.056	5006		0.054875	vacuole2					0.006	0.626	0.004	333		0.0025	vacuole15
0.011	7.489	0.084	7549		0.082625	vacuole3					0.008	1.169	0.01	879		0.008	vacuole16
0.04	6.447	0.259	23337		0.254	vacuole4					0.007	0.887	0.006	536		0.00425	vacuole17
0.015	6.378	0.096	8649		0.094125	vacuole5					0.007	4.367	0.029	2603		0.02725	vacuole18
0.015	6.332	0.092	8314		0.090125	vacuole6					0.005	0.537	0.003	264		0.00175	vacuole19
0.005	4.007	0.02	1795		0.019375	vacuole7					0.004	1.156	0.004	370		0.003	vacuole20
0.0008889	7.9	0.007	632		0.00688889	vacuole8					0.004	0.882	0.003	300		0.002	vacuole21
0.02	2.859	0.057	5157		0.0545	vacuole9					0.007	0.16	0.002	104		0.00025	vacuole22
0.009	4.78	0.042	3786		0.040875	vacuole10									Average	0.0140909
0.009	5.155	0.045	4083		0.043875	vacuole11									SD	0.0203626
0.008	1.545	0.012	1057		0.011	vacuole12
0.007	11.934	0.08	7208		0.079125	vacuole13
0.005	7.194	0.036	3223		0.035375	vacuole14
0.004	16.25	0.057	5135		0.0565	vacuole15
0.013	4.92	0.062	5570		0.060375	vacuole16
0.01	4.333	0.044	3934		0.04275	vacuole17
0.004	5.311	0.022	2018		0.0215	vacuole18
0.017	2.222	0.037	3368		0.034875	vacuole19
0.018	0.997	0.018	1659		0.01575	vacuole20
0.021	1.523	0.033	2930		0.030375	vacuole21
0.008	1.754	0.014	1242		0.013	vacuole22
0.012	2.646	0.031	2805		0.0295	vacuole23
0.013	2.613	0.035	3156		0.033375	vacuole24
0.003	3.048	0.008	756		0.007625	vacuole25
0.008	3.133	0.025	2218		0.024	vacuole26
0.018	5.217	0.092	8306		0.08975	vacuole27
0.006	2.842	0.017	1512		0.01625	vacuole28
0.008	7.024	0.055	4973		0.054	vacuole29
0.006	4.89	0.027	2445		0.02625	vacuole30
0.008	1.987	0.016	1407		0.015	vacuole31
0.025	1.029	0.025	2280		0.021875	vacuole32
				Average	0.0470551
				SD	0.0454982
