# Supplementary material for: Cell detoxification of secondary metabolites by P4-ATPase-mediated vesicle transport
Source: eLife. 2023 Jul 4;12:e79179. doi: 10.7554/eLife.79179 (PMC10322151; doi:10.7554/eLife.79179)
Supplement: Figure 3—figure supplement 1—source data 1. — Different strains showed variation in growth rates and the data were shown as [colony diameter CZP supplemented with CsA]/[colony diameter CZP]. Data are represented as the mean ± SD. ****p<0.0001 from Student′s t-test. File for the primary data corresponding to Figure 3—figure supplement 1C and G. [file elife-79179-fig3-figsupp1-data1.xlsx]

## Sheet: Sheet1
	Figure 3-figure supplement 1C									Figure 3-figure supplement 1G
										Colony diameter (cm)				Rep1	Rep2	Rep3
	Colony diameter (cm)				Rep1	Rep2	Rep3					WT	CZP+CsA	2.2	2.2	2.2
			WT	CZP+CsA	2.15	2.15	2.2						CZP	3.4	3.45	3.45
				CZP	3.3	3.4	3.35
												ΔBbCRPA	CZP+CsA	1.3	1.3	1.25
			ΔBbCRPA	CZP+CsA	1.3	1.25	1.25						CZP	3.3	3.25	3.25
				CZP	3.4	3.35	3.35
												M2	CZP+CsA	2.2	2.25	2.2
			eGFP::BbCrpa	CZP+CsA	2.1	2.2	2.1						CZP	3.45	3.4	3.4
				CZP	3.4	3.4	3.35
												M7	CZP+CsA	2.25	2.2	2.2
													CZP	3.45	3.4	3.45
	CZP supplemented with CsA normalized to growth at CZP
												M8	CZP+CsA	2.2	2.25	2.2
				WT	ΔBbCRPA	eGFP::BbCrpa							CZP	3.4	3.45	3.4
			Rep1	0.651515	0.382353	0.617647
			Rep2	0.632353	0.373134	0.647059						M12	CZP+CsA	2.2	2.15	2.2
			Rep3	0.656716	0.373134	0.626866							CZP	3.45	3.4	3.35
			Average	0.646862	0.376207	0.630524
			SD	0.0128311	0.00532237	0.0150433
			p-value		4.59903e-06	0.225625				CZP supplemented with CsA normalized to growth at CZP
													WT	ΔBbCRPA	M2	M7	M8	M12
												Rep1	0.647059	0.393939	0.637681	0.652174	0.647059	0.637681
												Rep2	0.637681	0.4	0.661765	0.647059	0.652174	0.632353
												Rep3	0.637681	0.384615	0.647059	0.637681	0.647059	0.656716
												Average	0.640807	0.392852	0.648835	0.645638	0.648764	0.64225
												SD	0.0054142	0.00774978	0.0121396	0.00735011	0.0029532	0.0128083
												p-value		1.40418e-06	0.354574	0.411225	0.0891502	0.866085
