# Supplementary material for: Cell detoxification of secondary metabolites by P4-ATPase-mediated vesicle transport
Source: eLife. 2023 Jul 4;12:e79179. doi: 10.7554/eLife.79179 (PMC10322151; doi:10.7554/eLife.79179)
Supplement: Figure 4—figure supplement 1—source data 1. — The variation in growth rates was shown as (colony diameter CZP/CZA supplemented with CsA]/[colony diameter CZP/CZA). All experiments were performed in triplicate. Data are represented as the mean ± SD. **p<0.01; ***p<0.001; ****p<0.0001 from Student′s t-test. File for the primary data corresponding to Figure 4—figure supplement 1B and D. [file elife-79179-fig4-figsupp1-data1.xlsx]

## Sheet: Sheet1
	Figure 4-figure supplement 1B
	Colony diameter (cm)				Rep1	Rep2	Rep3		CZP supplemented with FK506 normalized to growth at CZP
			WT	CZP+FK506	1.75	1.8	1.75
				CZP	3.4	3.45	3.4					WT	BFL	ΔBbCRPA	ΔBN	ΔBC	ΔBC1325-1359	ΔBC1326-1359	Y1325A	Y1325A-Y1341A	Y1325A-Y1350A	Y1341A-Y1350A	Y1325A-Y1341A-Y1350A
											Rep1	0.514706	0.514706	0.40625	0.4	0.40625	0.415385	0.514286	0.441176	0.4	0.4	0.434783	0.40625
			BFL	CZP+FK506	1.75	1.8	1.7				Rep2	0.521739	0.529412	0.384615	0.393939	0.384615	0.393939	0.507246	0.463768	0.40625	0.384615	0.441176	0.430769
				CZP	3.4	3.4	3.45				Rep3	0.514706	0.492754	0.4	0.378788	0.40625	0.4	0.507246	0.455882	0.384615	0.40625	0.449275	0.421875
											Average	0.51705	0.51229	0.396955	0.390909	0.399038	0.403108	0.509593	0.453609	0.396955	0.396955	0.441745	0.419631
			ΔBbCRPA	CZP+FK506	1.3	1.25	1.3				SD	0.00406065	0.0184481	0.0111341	0.0109259	0.0124908	0.0110553	0.00406416	0.0114661	0.0111341	0.0111341	0.00726307	0.0124126
				CZP	3.2	3.25	3.25				p-value		0.685037	6.18799e-05	4.76976e-05	9.9532e-05	7.43243e-05	0.0878104	0.000831842	6.18799e-05	6.18799e-05	9.6747e-05	0.000206992
			ΔBN	CZP+FK506	1.3	1.3	1.25						p-value
				CZP	3.25	3.3	3.3			ΔBbCRPA vs Y1325A			0.00356791
										ΔBbCRPA vs Y1341A-Y1350A			0.00429732
			ΔBC	CZP+FK506	1.3	1.25	1.3			Y1325A vs Y1341A-Y1350A			0.204589
				CZP	3.2	3.25	3.2
			ΔBC1325-1359	CZP+FK506	1.35	1.3	1.3
				CZP	3.25	3.3	3.25
			ΔBC1326-1359	CZP+FK506	1.8	1.75	1.75
				CZP	3.5	3.45	3.45
			Y1325A	CZP+FK506	1.5	1.6	1.55
				CZP	3.4	3.45	3.4
			Y1325A-Y1341A	CZP+FK506	1.3	1.3	1.25
				CZP	3.25	3.2	3.25
			Y1325A-Y1350A	CZP+FK506	1.3	1.25	1.3
				CZP	3.25	3.25	3.2
			Y1341A-Y1350A	CZP+FK506	1.5	1.5	1.55
				CZP	3.45	3.4	3.45
			Y1325A-Y1341A-Y1350A	CZP+FK506	1.3	1.4	1.35
				CZP	3.2	3.25	3.2
		Figure 4-figure supplement 1D
			Colony diameter (cm)				Rep1	Rep2	Rep3
					BFL	CZA+FK506	1.85	1.9	1.8
						CZA	3.4	3.45	3.4
					ΔBbCRPA	CZA+FK506	1	1	0.9
						CZA	3.45	3.4	3.45
					DFL	CZA+FK506	0.95	0.9	0.9
						CZA	3.4	3.45	3.4
					BN-DTMD-DC	CZA+FK506	0.9	0.9	1
						CZA	3.45	3.45	3.4
					DN-DTMD-BC	CZA+FK506	1	1	0.9
						CZA	3.4	3.45	3.4
					BN-DTMD-BC	CZA+FK506	1.3	1.4	1.35
						CZA	3.4	3.4	3.45
			CZA supplemented with FK506 normalized to growth at CZA
						BFL	ΔBbCRPA	DFL	BN-DTMD-DC	DN-DTMD-BC	BN-DTMD-BC
					Rep1	0.544118	0.289855	0.279412	0.26087	0.294118	0.382353
					Rep2	0.550725	0.294118	0.26087	0.26087	0.289855	0.411765
					Rep3	0.529412	0.26087	0.264706	0.294118	0.264706	0.391304
					Average	0.541418	0.281614	0.268329	0.271952	0.282893	0.395141
					SD	0.0109099	0.0180913	0.00978769	0.0191958	0.0158939	0.0150765
					p-value		2.87252e-05	5.49649e-06	2.96073e-05	2.03611e-05	0.000168543
							p-value
					ΔBbCRPA vs DFL		0.32592
					ΔBbCRPA vs BN-DTMD-DC		0.560269
					ΔBbCRPA vs DN-DTMD-BC		0.93114
					ΔBbCRPA vs BN-DTMD-BC		0.00112471
