# Supplementary material for: Cell detoxification of secondary metabolites by P4-ATPase-mediated vesicle transport
Source: eLife. 2023 Jul 4;12:e79179. doi: 10.7554/eLife.79179 (PMC10322151; doi:10.7554/eLife.79179)
Supplement: Figure 4—source data 1. — The variation in growth rates was quantified by calculating the ratio of colony diameter in the presence of CsA supplementation to the colony diameter in the absence of CsA supplementation ([colony diameter on CZP/CZA supplemented with CsA]/[colony diameter on CZP/CZA]). File for the primary data corresponding to Figure 4C and E. [file elife-79179-fig4-data1.xlsx]

## Sheet: Sheet1
		Figure 4C
		Colony diameter (cm)				Rep1	Rep2	Rep3		CZP supplemented with CsA normalized to growth at CZP
				WT	CZP+CsA	3.2	1.7	1.75
					CZP	3.25	3.45	3.4					WT	BFL	ΔBbCRPA	ΔBN	ΔBC	ΔBC1325-1359	ΔBC1326-1359	Y1325A	Y1325A-Y1341A	Y1325A-Y1350A	Y1341A-Y1350A	Y1325A-Y1341A-Y1350A
						3.2						Rep1	0.5	0.485294	0.34375	0.338462	0.375	0.338462	0.5	0.411765	0.338462	0.338462	0.405797	0.359375
				BFL	CZP+CsA	1.65	1.7	1.7				Rep2	0.492754	0.5	0.353846	0.348485	0.338462	0.363636	0.492754	0.42029	0.328125	0.323077	0.426471	0.323077
					CZP	3.4	3.4	3.45				Rep3	0.514706	0.492754	0.338462	0.333333	0.359375	0.338462	0.507246	0.411765	0.338462	0.34375	0.42029	0.34375
												Average	0.502487	0.492683	0.345353	0.340093	0.357612	0.346853	0.5	0.414606	0.335016	0.335096	0.417519	0.342067
				ΔBbCRPA	CZP+CsA	1.1	1.15	1.1				SD	0.0111854	0.0073532	0.00781651	0.00770642	0.0183329	0.0145347	0.00724638	0.004922	0.0059678	0.0107396	0.0106116	0.0182074
					CZP	3.2	3.25	3.25				p-value		0.273397	3.729e-05	3.21302e-05	0.000306776	0.000124694	0.762771	0.000238921	2.16184e-05	4.81729e-05	0.000672818	0.000201868
				ΔBN	CZP+CsA	1.1	1.15	1.1						p-value
					CZP	3.25	3.3	3.3			ΔBbCRPA vs Y1325A			0.000202907
											ΔBbCRPA vs Y1341A-Y1350A			0.000689697
				ΔBC	CZP+CsA	1.2	1.1	1.15			Y1325A vs Y1341A-Y1350A			0.688483
					CZP	3.2	3.25	3.2
				ΔBC1325-1359	CZP+CsA	1.1	1.2	1.1
					CZP	3.25	3.3	3.25
				ΔBC1326-1359	CZP+CsA	1.75	1.7	1.75
					CZP	3.5	3.45	3.45
				Y1325A	CZP+CsA	1.4	1.45	1.4
					CZP	3.4	3.45	3.4
				Y1325A-Y1341A	CZP+CsA	1.1	1.05	1.1
					CZP	3.25	3.2	3.25
				Y1325A-Y1350A	CZP+CsA	1.1	1.05	1.1
					CZP	3.25	3.25	3.2
				Y1341A-Y1350A	CZP+CsA	1.4	1.45	1.45
					CZP	3.45	3.4	3.45
				Y1325A-Y1341A-Y1350A	CZP+CsA	1.15	1.05	1.1
					CZP	3.2	3.25	3.2
		Figure 4E
			Colony diameter (cm)				Rep1	Rep2	Rep3
					BFL	CZA+CsA	1.9	1.85	1.85
						CZA	3.4	3.45	3.4
					ΔBbCRPA	CZA+CsA	1	0.9	0.9
						CZA	3.45	3.4	3.45
					DFL	CZA+CsA	0.9	1	0.9
						CZA	3.4	3.45	3.4
					BN-DTMD-DC	CZA+CsA	0.9	1	1
						CZA	3.45	3.45	3.4
					DN-DTMD-BC	CZA+CsA	0.9	0.95	0.9
						CZA	3.4	3.45	3.4
					BN-DTMD-BC	CZA+CsA	1.4	1.45	1.4
						CZA	3.4	3.4	3.45
			CZA supplemented with CsA normalized to growth at CZA
						BFL	ΔBbCRPA	DFL	BN-DTMD-DC	DN-DTMD-BC	BN-DTMD-BC
					Rep1	0.558824	0.289855	0.264706	0.26087	0.264706	0.411765
					Rep2	0.536232	0.264706	0.289855	0.289855	0.275362	0.426471
					Rep3	0.544118	0.26087	0.264706	0.294118	0.264706	0.405797
					Average	0.546391	0.27181	0.273089	0.281614	0.268258	0.414677
					SD	0.0114661	0.0157446	0.0145199	0.0180913	0.0061525	0.0106401
					p-value		1.66917e-05	1.38592e-05	2.81372e-05	3.17857e-06	0.00012856
						p-value
					ΔBbCRPA vs DFL	0.922612
					ΔBbCRPA vs BN-DTMD-DC	0.517999
					ΔBbCRPA vs DN-DTMD-BC	0.734306
					ΔBbCRPA vs BN-DTMD-BC	0.000200705
