# Supplementary material for: Cell detoxification of secondary metabolites by P4-ATPase-mediated vesicle transport
Source: eLife. 2023 Jul 4;12:e79179. doi: 10.7554/eLife.79179 (PMC10322151; doi:10.7554/eLife.79179)
Supplement: Figure 5—figure supplement 1—source data 1. — File for the primary data corresponding to Figure 5—figure supplement 1B and D. [file elife-79179-fig5-figsupp1-data1.xlsx]

## Sheet: Sheet1
		Figure 5-figure supplement 1B								Figure 5-figure supplement 1D
		BbCRPA expression level Arabidopsis								BbCRPA expression level in cotton
			Col-0	35S::BbCRPA-1	35S::BbCRPA-12
		Rep1	2e-05	8.63658	6.10093						WT	35S::BbCRPA-B1	35S::BbCRPA-B56
		Rep2	5.25857e-05	9.349	5.80535					Rep1	0	1.55354	1.28883
		Rep3	2.61771e-05	10.2577	7.98192					Rep2	0	2.25421	0.99021
		Average	3.29209e-05	9.41443	6.6294					Rep3	0	2.32528	1.48057
		SD	1.7308e-05	0.812545	1.1806					Average	0	2.04434	1.2532
										SD	0	0.426531	0.247114
