# Supplementary material for: Cell detoxification of secondary metabolites by P4-ATPase-mediated vesicle transport
Source: eLife. 2023 Jul 4;12:e79179. doi: 10.7554/eLife.79179 (PMC10322151; doi:10.7554/eLife.79179)
Supplement: Figure 5—figure supplement 1—source data 3. — File for the primary data corresponding to Figure 5—figure supplement 1G–J. [file elife-79179-fig5-figsupp1-data3.xlsx]

## Sheet: Sheet1
		Figure 5-figure supplement 1G
		Lines	Number of plants of different grades of disease					Total plants	Number of infected plants	Disease Index (DI)
			0	1	2	3	4
		Col-0	2	1	4	4	3	14	12	68.75
		Col-0	3	0	2	6	4	15	12	79.1667
		Col-0	3	1	2	4	5	15	12	77.0833
		35S::BbCRPA-1	4	7	3	1	1	16	12	41.6667
		35S::BbCRPA-1	3	9	2	1	0	15	12	33.3333
		35S::BbCRPA-1	5	8	2	2	0	17	12	37.5
		35S::BbCRPA-12	2	8	3	1	0	14	12	35.4167
		35S::BbCRPA-12	2	8	2	1	1	14	12	39.5833
		35S::BbCRPA-12	3	9	3	0	0	15	12	31.25
		DI = [∑(disease grades × number of infected plants)/(total checked plants × 4)] × 100
		Lines	Disease Index (DI)
			Rep1	Rep2	Rep3	Average	SD	p-vaule
		Col-0	68.75	79.1667	77.0833	75	5.51198
		35S::BbCRPA-1	41.6667	33.3333	37.5	37.5	4.16667	0.000713721
		35S::BbCRPA-12	35.4167	39.5833	31.25	35.4167	4.16667	0.000579202
		Figure 5-figure supplement 1H
		Lines	Number of plants of different grades of disease					Total plants	Number of infected plants	Disease Index (DI)
			0	1	2	3	4
		WT	5	0	2	5	8	20	15	85
		WT	3	0	1	5	9	18	15	88.3333
		WT	3	0	0	4	11	18	15	93.3333
		35S::BbCRPA-B1	8	6	5	3	1	23	15	48.3333
		35S::BbCRPA-B1	10	7	5	2	1	25	15	45
		35S::BbCRPA-B1	6	8	5	1	1	21	15	41.6667
		35S::BbCRPA-B56	14	8	5	2	0	29	15	40
		35S::BbCRPA-B56	9	10	3	1	1	17	15	38.3333
		35S::BbCRPA-B56	12	9	5	1	1	56	16	40.625
		DI = [∑(disease grades × number of infected plants)/(total checked plants × 4)] × 100
		Lines	Disease Index (DI)
			Rep1	Rep2	Rep3	Average	SD	p-vaule
		WT	85	88.3333	93.3333	88.8889	4.19435
		35S::BbCRPA-B1	48.3333	45	41.6667	45	3.33333	0.000143258
		35S::BbCRPA-B56	40	38.3333	40.625	39.6528	1.18463	4.02319e-05
		Figure 5-figure supplement 1I
		Lines	Number of plants of different grades of disease					Total plants	Number of infected plants	Disease Index (DI)
			0	1	2	3	4
		Col-0	5	3	3	4	5	20	15	68.3333
		Col-0	6	5	3	4	4	22	16	60.9375
		Col-0	4	3	2	6	3	18	14	66.0714
		35S::BbCRPA-1	7	10	3	0	0	20	13	30.7692
		35S::BbCRPA-1	7	12	2	1	0	22	15	31.6667
		35S::BbCRPA-1	5	14	2	0	0	21	16	28.125
		35S::BbCRPA-12	6	12	3	1	0	22	16	32.8125
		35S::BbCRPA-12	8	9	5	1	0	23	15	36.6667
		35S::BbCRPA-12	5	11	3	1	0	20	15	33.3333
		DI = [∑(disease grades × number of infected plants)/(total checked plants × 4)] × 100
		Lines	Disease Index (DI)
			Rep1	Rep2	Rep3	Average	SD	p-vaule
		Col-0	68.3333	60.9375	66.0714	65.1141	3.78972
		35S::BbCRPA-1	30.7692	31.6667	28.125	30.187	1.84123	0.000136723
		35S::BbCRPA-12	32.8125	36.6667	33.3333	34.2708	2.09113	0.000247625
		Figure 5-figure supplement 1J
		Lines	Number of plants of different grades of disease					Total plants	Number of infected plants	Disease Index (DI)
			0	1	2	3	4
		WT	4	0	3	3	10	20	16	85.9375
		WT	7	1	2	5	9	24	17	82.3529
		WT	5	0	2	3	12	22	17	89.7059
		35S::BbCRPA-B1	9	6	5	3	3	26	17	54.4118
		35S::BbCRPA-B1	8	7	2	4	4	25	17	57.3529
		35S::BbCRPA-B1	11	6	6	2	3	28	17	52.9412
		35S::BbCRPA-B56	10	8	4	4	2	28	18	50
		35S::BbCRPA-B56	13	6	4	3	4	30	17	57.3529
		35S::BbCRPA-B56	11	7	5	3	3	29	18	52.7778
		DI = [∑(disease grades × number of infected plants)/(total checked plants × 4)] × 100
		Lines	Disease Index (DI)
			Rep1	Rep2	Rep3	Average	SD	p-vaule
		WT	85.9375	82.3529	89.7059	85.9988	3.67685
		35S::BbCRPA-B1	54.4118	57.3529	52.9412	54.902	2.24636	0.000235585
		35S::BbCRPA-B56	50	57.3529	52.7778	53.3769	3.7129	0.000414944
