# Supplementary material for: Cell detoxification of secondary metabolites by P4-ATPase-mediated vesicle transport
Source: eLife. 2023 Jul 4;12:e79179. doi: 10.7554/eLife.79179 (PMC10322151; doi:10.7554/eLife.79179)
Supplement: Figure 5—source data 1. — The disease index of T3 transgenic Arabidopsis and the wild-type plants to V. dahliae was evaluated 21 days after inoculation. The disease index of T2 transgenic cotton to V. dahliae was evaluated 14 days after inoculation. DI = [∑(disease grades ×number of infected plants)/(total checked plants ×4)]×100. Data are represented as the mean ± SD. ***p<0.001; ****p<0.0001 from Student′s t-test. File for the primary data corresponding to Figure 5C, G and I. [file elife-79179-fig5-data1.xlsx]

## Sheet: Sheet1
		Figure 5C
															Figure 5G
		Lines	Number of plants of different grades of disease					Total plants	Number of infected plants	Disease Index (DI)					Lines	Number of plants of different grades of disease					Total plants	Number of infected plants	Disease Index (DI)
			0	1	2	3	4									0	1	2	3	4
		Col-0	5	0	0	2	4	11	6	91.6667					WT	0	12	7	7	74	100	100	85.75
		Col-0	5	0	0	13	1	19	14	76.7857					WT	1	10	5	6	41	63	62	80.1587
		Col-0	4	0	0	4	4	12	8	87.5					WT	0	10	4	2	24	40	40	75
		35S::BbCRPA-1	8	6	0	0	0	14	6	25					35S::BbCRPA-B1	12	10	2	2	1	27	15	22.2222
		35S::BbCRPA-1	6	10	0	0	0	16	10	25					35S::BbCRPA-B1	8	0	1	2	0	11	3	18.1818
		35S::BbCRPA-1	5	6	2	0	0	13	8	31.25					35S::BbCRPA-B1	8	2	0	2	1	13	5	23.0769
		35S::BbCRPA-12	6	6	0	0	0	12	6	25					35S::BbCRPA-B56	32	12	5	2	10	61	29	27.8689
		35S::BbCRPA-12	7	10	0	0	0	17	10	25					35S::BbCRPA-B56	8	3	2	1	3	17	9	32.3529
		35S::BbCRPA-12	7	5	3	0	0	15	8	34.375					35S::BbCRPA-B56	34	9	1	2	10	56	22	25.4464
		DI = [∑(disease grades × number of infected plants)/(total checked plants × 4)] × 100
		Lines	Disease Index (DI)												DI = [∑(disease grades × number of infected plants)/(total checked plants × 4)] × 100
			1	2	3	Average	SD	p-vaule							Lines	Disease Index (DI)
		Col-0	91.6667	76.7857	87.5	85.3175	7.6768									Rep1	Rep2	Rep3	Average	SD	p-vaule
		35S::BbCRPA-1	25	25	31.25	27.0833	3.60844	0.000286487							WT	85.75	80.1587	75	80.3029	5.37645
		35S::BbCRPA-12	25	25	34.375	28.125	5.41266	0.000457292							35S::BbCRPA-B1	22.2222	18.1818	23.0769	21.1603	2.61462	6.80578e-05
															35S::BbCRPA-B56	27.8689	32.3529	25.4464	28.5561	3.50417	0.000152461
	Figure 5I CIA-5-FITC fluorescent intensity within Arabidopsis cells														Figure 5I CIA-5-FITC fluorescent intensity within Arabidopsis cells
		Corrected IntDen = IntDen-Area*Mean(background)														Corrected IntDen = IntDen-Area*Mean(background)
	Col-0														35S::BbCRPA
	Area	Mean	IntDen	RawIntDen	Corrected IntDen										Area	Mean	IntDen	RawIntDen	Corrected IntDen
	0.015	24.608	0.375	1944	0.34064	vacuole1									0.052	48.588	2.514	226227	2.44066	vacuole1
	0.013	24.652	0.328	1701	0.298221	vacuole2									0.024	68.887	1.623	146040	1.58915	vacuole2
	0.017	12.012	0.199	1033	0.160059	vacuole3									0.025	86.42	2.128	191507	2.09274	vacuole3
	0.02	16.365	0.328	1702	0.282187	vacuole4									0.023	75.901	1.724	155141	1.69156	vacuole4
	0.024	18.218	0.436	2259	0.381024	vacuole5									0.026	86.231	2.277	204970	2.24033	vacuole5
	0.022	18.304	0.406	2105	0.355605	vacuole6									0.025	86.667	2.123	191100	2.08774	vacuole6
	0.022	17.087	0.379	1965	0.328605	vacuole7									0.023	86.515	1.996	179606	1.96356	vacuole7
	0.034	2.25	0.076	396		background1									0.005	2.243	0.011	1014		background1
	0.027	2.257	0.061	316		background2		2.29066666666667 (background mean for vacuole1-7)							0.025	0.988	0.024	2182		background2		1.41033333333333 (background mean for vacuole1-7)
	0.024	2.365	0.057	298		background3									0.024	1	0.024	2128		background3
	0.02	15.942	0.32	1658	0.27514	vacuole8
	0.017	13.523	0.224	1163	0.185869	vacuole9									0.021	72.917	1.499	134897	1.46347	vacuole8
	0.015	10.532	0.16	832	0.126355	vacuole10									0.02	86.929	1.777	159950	1.74316	vacuole9
	0.01	16.808	0.169	874	0.14657	vacuole11									0.026	86.037	2.194	197455	2.15001	vacuole10
	0.007	19.378	0.138	717	0.122299	vacuole12									0.018	87.517	1.583	142477	1.55254	vacuole11
	0.028	13.158	0.371	1921	0.308196	vacuole13									0.027	79.288	2.106	189499	2.06032	vacuole12
	0.024	13.734	0.329	1703	0.275168	vacuole14									0.023	66.926	1.52	136796	1.48108	vacuole13
	0.024	2.282	0.055	283		background4									0.038	60.635	2.299	206885	2.2347	vacuole14
	0.037	2.182	0.081	419		background5		2.243 (background mean for vacuole8-14)							0.043	1	0.043	3904		background1
	0.026	2.265	0.059	308		background6									0.035	1.66	0.008	697		background2		1.692 (background mean for vacuole8-14)
															0.025	2.416	0.012	1092		background3
	0.022	13.634	0.295	1527	0.236663	vacuole15
	0.02	15.441	0.304	1575	0.250967	vacuole16
	0.02	14.952	0.3	1555	0.246967	vacuole17									0.044	50.025	2.194	197500	2.1181	vacuole15
	0.024	12.887	0.308	1598	0.24436	vacuole18									0.039	61.554	2.396	215684	2.32872	vacuole16
	0.028	13.596	0.383	1985	0.308753	vacuole19									0.039	48.963	1.922	172937	1.85472	vacuole17
	0.027	12.586	0.34	1762	0.268405	vacuole20									0.033	51.556	1.68	151161	1.62308	vacuole18
	0.015	15.675	0.242	1254	0.202225	vacuole21									0.04	63.981	2.568	231098	2.499	vacuole19
	0.04	2.522	0.101	522		background7									0.045	44.449	2.009	180820	1.93137	vacuole20
	0.028	2.753	0.078	402		background8		2.65166666666667 (background mean for vacuole15-21)							0.031	63.183	1.988	178934	1.93453	vacuole21
	0.044	2.68	0.118	611		background9									0.03	1	0.03	2732		background1
															0.026	1.915	0.012	1103		background2		1.725 ( background mean for vacuole15-21)
															0.027	2.26	0.015	1383		background3
					average	0.254489
					SD	0.0745295													average	1.95622
																			SD	0.311527
