# Supplementary material for: Cell detoxification of secondary metabolites by P4-ATPase-mediated vesicle transport
Source: eLife. 2023 Jul 4;12:e79179. doi: 10.7554/eLife.79179 (PMC10322151; doi:10.7554/eLife.79179)
Supplement: Source data 1. [file elife-79179-data1.xlsx]

## Sheet: Sheet1
		Supplementary file 3B
			Colony diameter (cm)				Rep1	Rep2	Rep3		Colony diameter (cm)				Rep1	Rep2	Rep3
					WT	CZA+CsA	1.55	1.6	1.6				WT	CZP+CsA	1.9	1.95	1.95
						CZA	3.05	3.1	3.1					CZP	3.7	3.7	3.75
					ΔBbCRPA	CZA+CsA	0.9	0.95	0.95				ΔBbCRPA	CZP+CsA	1.2	1.2	1.25
						CZA	2.95	3	3.05					CZP	3.55	3.55	3.6
					ΔBbATG1	CZA+CsA	1.6	1.65	1.7				ΔBbATG1	CZP+CsA	1.9	1.95	2
						CZA	3.2	3.2	3.2					CZP	3.65	3.7	3.7
			CZA supplemented with CsA normalized to growth at CZA								CZP supplemented with CsA normalized to growth at CZP
						WT	ΔBbCRPA	ΔBbATG1						WT	ΔBbCRPA	ΔBbATG1
					Rep1	0.508197	0.305085	0.5					Rep1	0.513514	0.338028	0.520548
					Rep2	0.516129	0.316667	0.515625					Rep2	0.527027	0.338028	0.527027
					Rep3	0.516129	0.311475	0.53125					Rep3	0.52	0.347222	0.540541
					Average	0.513485	0.311076	0.515625					Average	0.52018	0.341093	0.529372
					SD	0.00457972	0.0058013	0.015625					SD	0.00675856	0.00530819	0.0102005
					p-value		1.18181e-06	0.831079					p-value		3.51714e-06	0.263117
		Supplementary file 3E
			Colony diameter (cm)				Rep1	Rep2	Rep3
					WT	CZP+CsA	2.5	2.5	2.55
						CZP	3.85	3.9	3.9
					ΔBbCRPA	CZP+CsA	1.5	1.45	1.5
						CZP	3.8	3.75	3.8
					BbAP-1 RNAi	CZP+CsA	2.55	2.6	2.55
						CZP	3.9	3.95	3.9
					ΔBbCLC	CZP+CsA	1.9	1.9	1.95
						CZP	2.9	2.95	2.9
					BbCHC RNAi	CZP+CsA	2.45	2.5	2.5
						CZP	3.9	3.9	3.95
			CZP supplemented with CsA normalized to growth at CZP
						WT	ΔBbCRPA	BbAP-1 RNAi	ΔBbCLC	BbCHC RNAi
					Rep1	0.649351	0.394737	0.653846	0.655172	0.628205
					Rep2	0.641026	0.386667	0.658228	0.644068	0.641026
					Rep3	0.653846	0.394737	0.653846	0.672414	0.632911
					Average	0.648074	0.392047	0.655307	0.657218	0.634047
					SD	0.00650488	0.00465932	0.00252977	0.0142833	0.00648531
					p-value		6.34584e-07	0.147116	0.370011	0.0572834
